# Supplementary material for: Oral Myco- and Bacteriobiota and Yeast Infections in Mechanically Ventilated COVID-19 Patients
Source: MDPI journal article supplement (doi:10.3390/microorganisms11061442), 2023-05-30
Supplement: s1 [file s1]

| Table S1. Microbial strain density according to sampling.               |                             |                             |         |
|-------------------------------------------------------------------------|-----------------------------|-----------------------------|---------|
| Baseline CFU/ml from oral samples                                       | Baseline                    | Follow-up                   | P value |
| <i>Acinetobacter baumannii</i>                                          | 1.0E+04 (2.3E+03 – 2.6E+04) | 3.5E+04 (8.8E+04 – 2.8E+05) | NS      |
| <i>Candida</i> spp.                                                     | 2.3E+04 (5.0E+3 – 7.9+E04)  | 1.2E+04 (3.0E+3 – 5.0E+04)  | NS      |
| <i>Enterococcus</i> spp.                                                | 4.0E+05 (7.8E+04 – 1.0E+06) | 1.5E+05 (4.5E+04 – 6.0E+05) | NS      |
| <i>Escherichia coli</i>                                                 | 1.3E+04 (2.3E+03 – 3.1E+05) | 3.0E+04 (3.0E+04 – NA)      | NS      |
| <i>Klebsiella pneumoniae</i>                                            | 2.0E+04 (3.0E+02 – 1.0E+05) | 2.4E+05 (4.5E+04 – 2.1E+06) | NS      |
| <i>Lactobacillus</i> spp.                                               | 1.0E+06 (2.0E+05 – 2.0E+06) | 3.0E+05 (1.0E+05 – 1.6E+06) | NS      |
| <i>Prevotella</i> spp.                                                  | 3.0E+05 (1.0E+05 – 1.5E+06) | 1.3E+06 (9.3E+05 – 2.3E+06) | NS      |
| <i>Streptococcus</i> spp.                                               | 5.0E+05 (1.5E+05 – 1.5E+06) | 4.0E+05 (8.5E+04 – 1.0E+-6) | NS      |
| <i>Staphylococcus</i> spp.                                              | 5.0E+05 (2.0E+05 – 1.0E+06) | 3.5E+05 (1.5E+05 – 1.0E+06) | NS      |
| data are presented mean (SD), median (Q1-Q3), CFU – colony forming unit |                             |                             |         |

Table S2. SOFA score in patients according to *Candida* spp. identification in oral samples

|                                                                  | <i>Candida</i> spp. present vs. non present at baseline | <i>Candida albicans</i> present vs. non present at baseline | <i>Candida</i> non <i>albicans</i> present vs. non present at baseline | <i>Candida</i> spp. present vs. non present at follow-up | <i>Candida albicans</i> present vs. non present at follow-up | <i>Candida</i> non <i>albicans</i> present vs. non present at follow-up |
|------------------------------------------------------------------|---------------------------------------------------------|-------------------------------------------------------------|------------------------------------------------------------------------|----------------------------------------------------------|--------------------------------------------------------------|-------------------------------------------------------------------------|
| SOFA score, baseline                                             | NS                                                      | NS                                                          | NS                                                                     | NS                                                       | NS                                                           | NS                                                                      |
| SOFA score, follow-up                                            | NS                                                      | NS                                                          | NS                                                                     | NS                                                       | NS                                                           | NS                                                                      |
| SOFA - Sequential Organ Failure Assessment, NS – not significant |                                                         |                                                             |                                                                        |                                                          |                                                              |                                                                         |

Table S3. Baseline and follow-up characteristics by oral health status category.

|                                                                                                                          | Baseline                         |                                  |         | Follow-up                     |                                  |         |
|--------------------------------------------------------------------------------------------------------------------------|----------------------------------|----------------------------------|---------|-------------------------------|----------------------------------|---------|
| Characteristics                                                                                                          | BOAS 0-10                        | BOAS 11-20                       | p value | BOAS 0-10                     | BOAS 11-20                       | p value |
| Percentage of patients with selected genera/species in oral samples at baseline                                          |                                  |                                  |         |                               |                                  |         |
| <i>Candida</i> spp.                                                                                                      | 84.6%                            | 80.6%                            | NS      | 92.9%                         | 73.7%                            | NS      |
| <i>Candida albicans</i>                                                                                                  | 53.8%                            | 63.9%                            | NS      | 71.4%                         | 42.1%                            | NS      |
| <i>Candida non-albicans</i>                                                                                              | 53.8                             | 41.7%                            | NS      | 50.0%                         | 47.4%                            | NS      |
| Percentage of patients with selected genera/species in oral samples at follow-up                                         |                                  |                                  |         |                               |                                  |         |
| <i>Candida</i> spp.                                                                                                      | 70.0%                            | 79.2%                            | NS      | 78.6%                         | 73.7%                            | NS      |
| <i>Candida albicans</i>                                                                                                  | 50.0%                            | 73.9%                            | NS      | 69.2%                         | 63.2%                            | NS      |
| <i>Candida non-albicans</i>                                                                                              | 50.0%                            | 66.7%                            | NS      | 53.8%                         | 36.8%                            | NS      |
| CFU/ml from oral samples from all oral sites at baseline                                                                 |                                  |                                  |         |                               |                                  |         |
| All <i>Candida</i> spp.                                                                                                  | 2.0E+04<br>(3.8E+03-<br>5.0E+04) | 1.4E+04<br>(2.2E+03-<br>5.0E+04) | NS      | 8.6E+03 (3.0E+03-<br>5.0E+04) | 3.0E+04<br>(8.0E+03-<br>5.0E+04) | NS      |
| CFU/ml from oral samples from all oral sites at follow-up                                                                |                                  |                                  |         |                               |                                  |         |
| All <i>Candida</i> spp.                                                                                                  | 4.5E+04<br>(1.5E+04-<br>2.1E+05) | 5.0E+04<br>(7.8E+3-<br>1.3E+05)  | NS      | 1.9E+04 (4.5E+03-<br>5.1E+04) | 5.0E+04<br>(4.1E+04-<br>3.0E+05) | NS      |
| data are presented as the means (SDs), medians (Q1-Q3) or N [%]; BOAS – Beck Oral Assessment Scale, NS – not significant |                                  |                                  |         |                               |                                  |         |

Table S4. Baseline and follow-up characteristics by history of diabetes

|                                                                                       | Baseline                         |                                  |         | Follow-up                     |                                  |         |
|---------------------------------------------------------------------------------------|----------------------------------|----------------------------------|---------|-------------------------------|----------------------------------|---------|
| Characteristics                                                                       | +                                | -                                | p value | +                             | -                                | p value |
| Percentage of patients with selected genera/species in oral samples                   |                                  |                                  |         |                               |                                  |         |
| <i>Candida spp.</i>                                                                   | 85.0%                            | 77.8%                            | NS      | 80.0%                         | 72.7%                            | NS      |
| <i>Candida albicans</i>                                                               | 65.0%                            | 52.8%                            | NS      | 71.4%                         | 54.5%                            | NS      |
| <i>Candida non-albicans</i>                                                           | 40.0%                            | 52.8%                            | NS      | 42.9%                         | 50.0%                            | NS      |
| CFU/ml from oral samples from all oral sites                                          |                                  |                                  |         |                               |                                  |         |
| All <i>Candida spp.</i>                                                               | 1.9E+04<br>(4.0E+03-<br>5.0E+04) | 1.8E+04<br>(1.5E+03-<br>4.0E+04) | NS      | 4.0E+04 (8.6E+03-<br>7.3E+04) | 5.0E+04<br>(4.1E+03-<br>4.0E+05) | NS      |
| data are presented as the means (SDs), medians (Q1-Q3) or N [%], NS – not significant |                                  |                                  |         |                               |                                  |         |

|                                                                                       | Baseline                         |                                  |         | Follow-up                     |                                  |         |
|---------------------------------------------------------------------------------------|----------------------------------|----------------------------------|---------|-------------------------------|----------------------------------|---------|
| Characteristics                                                                       | Standard procedure               | Extended procedure               | p value | Standard procedure            | Extended procedure               | p value |
| Percentage of patients with selected genera/species in oral samples                   |                                  |                                  |         |                               |                                  |         |
| <i>Candida</i> spp.                                                                   | 88.0%                            | 74.2%                            | NS      | 88.9%                         | 63.2%                            | NS      |
| <i>Candida albicans</i>                                                               | 68.0%                            | 48.4%                            | NS      | 77.8%                         | 44.4%                            | NS      |
| <i>Candida non-albicans</i>                                                           | 52.0%                            | 45.2%                            | NS      | 55.6%                         | 38.9%                            | NS      |
| CFU/ml from oral samples from all oral sites                                          |                                  |                                  |         |                               |                                  |         |
| All <i>Candida</i> spp.                                                               | 1.8+E04<br>(3.6E+03-<br>5.0E+04) | 1.5E+04<br>(3.1E+03-<br>6.5E+04) | NS      | 5.0E+04 (5.1E+03-<br>1.5E+05) | 4.0E+04<br>(8.2E+03-<br>1.3E+05) | NS      |
| data are presented as the means (SDs), medians (Q1-Q3) or N [%], NS – not significant |                                  |                                  |         |                               |                                  |         |

Table S6. Baseline and follow-up characteristics by antifungal agents use.

|                                                                                       |                                  |                                  |         |                               |                                  |         |
|---------------------------------------------------------------------------------------|----------------------------------|----------------------------------|---------|-------------------------------|----------------------------------|---------|
|                                                                                       | pre-ICU antifungal agents use    |                                  |         | in-ICU antifungal agents use  |                                  |         |
| Characteristics                                                                       | -                                | +                                | p value | -                             | +                                | p value |
| Percentage of patients with selected genera/species in oral samples at baseline       |                                  |                                  |         |                               |                                  |         |
| <i>Candida</i> spp.                                                                   | 84.8%                            | 50.0%                            | NS      | 79.2%                         | 87.5%                            | NS      |
| <i>Candida albicans</i>                                                               | 60.9%                            | 33.3%                            | NS      | 56.3%                         | 62.5%                            | NS      |
| <i>Candida non-albicans</i>                                                           | 50.0%                            | 50.0%                            | NS      | 43.8%                         | 75.0%                            | NS      |
| Percentage of patients with selected genera/species in oral samples at follow-up      |                                  |                                  |         |                               |                                  |         |
| <i>Candida</i> spp.                                                                   | 82.8%                            | 40.0%                            | NS      | 72.4%                         | 87.5%                            | NS      |
| <i>Candida albicans</i>                                                               | 71.4%                            | 33.3%                            | NS      | 60.7%                         | 62.5%                            | NS      |
| <i>Candida non-albicans</i>                                                           | 46.4%                            | 40.0%                            | NS      | 42.9%                         | 62.5%                            | NS      |
| CFU/ml from oral samples from all oral sites at baseline                              |                                  |                                  |         |                               |                                  |         |
| All <i>Candida</i> spp.                                                               | 1.4E+04<br>(2.2E+03-<br>5.0E+04) | 4.3E+04<br>(9.8E+03-<br>3.1E+05) | NS      | 1.7E+04 (2.0E+03-<br>5.0E+04) | 1.8E+04<br>(5.0E+03-<br>8.0E+04) | NS      |
| CFU/ml from oral samples from all oral sites at follow-up                             |                                  |                                  |         |                               |                                  |         |
| All <i>Candida</i> spp.                                                               | 5.0E+04<br>(8.9E+03-<br>1.4E+05) | 1.1E+04<br>(1.4E+03-<br>1.4E+05) | NS      | 5.0E+04 (5.0E+03-<br>2.0E+05) | 5.0E+04<br>(1.4E+04-<br>9.0E+04) | NS      |
| data are presented as the means (SDs), medians (Q1-Q3) or N [%], NS – not significant |                                  |                                  |         |                               |                                  |         |

Table S7. Baseline and follow-up characteristics by antibiotic use.

|                                                                                       |                                  |                                  |         |                               |                                  |         |
|---------------------------------------------------------------------------------------|----------------------------------|----------------------------------|---------|-------------------------------|----------------------------------|---------|
|                                                                                       | pre-ICU antibiotic use.          |                                  |         | in-ICU antibiotic use.        |                                  |         |
| Characteristics                                                                       | -                                | +                                | p value | -                             | +                                | p value |
| Percentage of patients with selected genera/species in oral samples at baseline       |                                  |                                  |         |                               |                                  |         |
| <i>Candida</i> spp.                                                                   | 78.9%                            | 81.8%                            | NS      | 80.0%                         | 80.6%                            | NS      |
| <i>Candida albicans</i>                                                               | 47.4%                            | 63.6%                            | NS      | 64.0%                         | 51.6%                            | NS      |
| <i>Candida non-albicans</i>                                                           | 52.6%                            | 48.5%                            | NS      | 40.0%                         | 54.8%                            | NS      |
| Percentage of patients with selected genera/species in oral samples at follow-up      |                                  |                                  |         |                               |                                  |         |
| <i>Candida</i> spp.                                                                   | 71.4%                            | 80.0%                            | NS      | 80.0%                         | 74.1%                            | NS      |
| <i>Candida albicans</i>                                                               | 64.3%                            | 63.2%                            | NS      | 60.0%                         | 61.5%                            | NS      |
| <i>Candida non-albicans</i>                                                           | 42.9%                            | 47.4%                            | NS      | 40.0%                         | 50.0%                            | NS      |
| CFU/ml from oral samples from all oral sites at baseline                              |                                  |                                  |         |                               |                                  |         |
| All <i>Candida</i> spp.                                                               | 8.0E+03<br>(2.0E+03-<br>3.0E+04) | 2.3E+04<br>(4.2E+03-<br>5.0E+04) | NS      | 2.5E+04 (4.4E+03-<br>5.0E+04) | 1.4E+04<br>(2.0E+03-<br>5.0E+04) | NS      |
| CFU/ml from oral samples from all oral sites at follow-up                             |                                  |                                  |         |                               |                                  |         |
| All <i>Candida</i> spp.                                                               | 5.0E+04<br>(3.0E+04-<br>2.5E+05) | 3.9E+04<br>(6.6E+03-<br>6.6E+04) | NS      | 3.9E+04 (4.9E+03-<br>5.0E+04) | 5.0E+04<br>(9.6E+03-<br>2.3E+05) | NS      |
| data are presented as the means (SDs), medians (Q1-Q3) or N [%], NS – not significant |                                  |                                  |         |                               |                                  |         |

Table S8. Baseline and follow-up characteristics by steroid use.

|                                                                                       | pre-ICU steroid use              |                                  |         | in-ICU steroid use            |                                  |         |
|---------------------------------------------------------------------------------------|----------------------------------|----------------------------------|---------|-------------------------------|----------------------------------|---------|
| Characteristics                                                                       | -                                | +                                | p value | -                             | +                                | p value |
| Percentage of patients with selected genera/species in oral samples at baseline       |                                  |                                  |         |                               |                                  |         |
| <i>Candida</i> spp.                                                                   | 75.0%                            | 82.5%                            | NS      | 87.5%                         | 79.2%                            | NS      |
| <i>Candida albicans</i>                                                               | 41.7%                            | 62.5%                            | NS      | 62.5%                         | 56.3%                            | NS      |
| <i>Candida non-albicans</i>                                                           | 58.3%                            | 47.5%                            | NS      | 75.0%                         | 43.8%                            | NS      |
| Percentage of patients with selected genera/species in oral samples at follow-up      |                                  |                                  |         |                               |                                  |         |
| <i>Candida</i> spp.                                                                   | 62.5%                            | 80.8%                            | NS      | 80.0%                         | 75.0%                            | NS      |
| <i>Candida albicans</i>                                                               | 50.0%                            | 68.0%                            | NS      | 60.0%                         | 61.3%                            | NS      |
| <i>Candida non-albicans</i>                                                           | 50.0%                            | 44.0%                            | NS      | 40.0%                         | 48.4%                            | NS      |
| CFU/ml from oral samples from all oral sites at baseline                              |                                  |                                  |         |                               |                                  |         |
| All <i>Candida</i> spp.                                                               | 8.0E+03<br>(3.0E+02-<br>5.0E+04) | 1.9E+04<br>(4.1E+04-<br>5.1E+04) | NS      | 1.1E+04 (2.2E+02-<br>4.0E+04) | 2.0E+04<br>(4.0E+03-<br>5.0E+4)  | NS      |
| CFU/ml from oral samples from all oral sites at follow-up                             |                                  |                                  |         |                               |                                  |         |
| All <i>Candida</i> spp.                                                               | 5.0E+04<br>(1.0E+04-<br>1.9E+05) | 4.6E+04<br>(8.9E+03-<br>1.3E+05) | NS      | 1.9E+04 (1.0E+04-<br>8.0E+04) | 5.0E+04<br>(6.0E+03-<br>1.5E+05) | NS      |
| data are presented as the means (SDs), medians (Q1-Q3) or N [%], NS – not significant |                                  |                                  |         |                               |                                  |         |
